# Supplementary material
Source: PubMed Central journal article supplement (PMC4936567)
Supplement: supp_pp.16.00361_PP2016-00361DR2_Supplemental_Material.pdf [file supp_pp.16.00361_PP2016-00361DR2_Supplemental_Material.pdf]

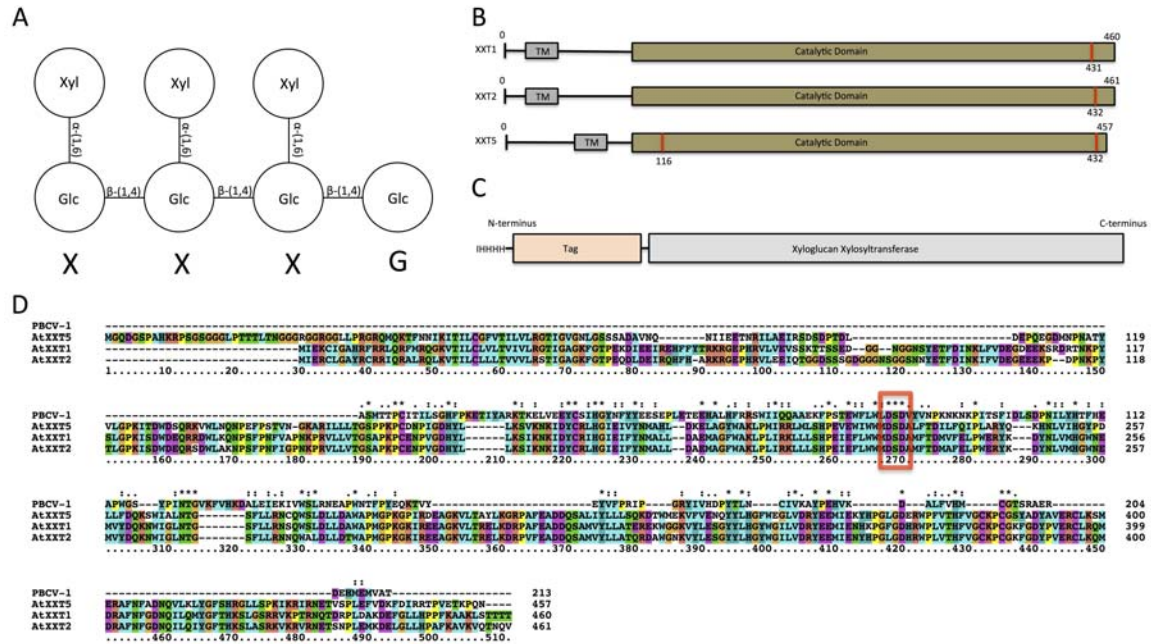

1  
 2 Supplemental Figure S1. Predicted topology of xyloglucan xylosyltransferases  
 3 according to the Universal Protein Resource (<http://www.uniprot.org>). A. Diagram of  
 4 xyloglycated glucan subunit showing nomenclature used. B. Positions of the predicted  
 5 transmembrane domain (TM) and catalytic domain based on primary amino acid  
 6 sequence. The section between the TM and the catalytic domain corresponds to the stem  
 7 region of the protein. Red lines indicate the predicted glycosylation sites (Asn-X-  
 8 Ser/Thr). C. Position of the His-Tag, solubility tag, and cDNA of recombinant proteins.  
 9 D. Sequence alignment of XXT1, XXT2, XXT5, and PBVC-1 GT (Zhang et al., 2007).  
 10 Red boxes indicate the positions of mutated amino acids. Sequence alignment was  
 11 created using Clustal Omega.

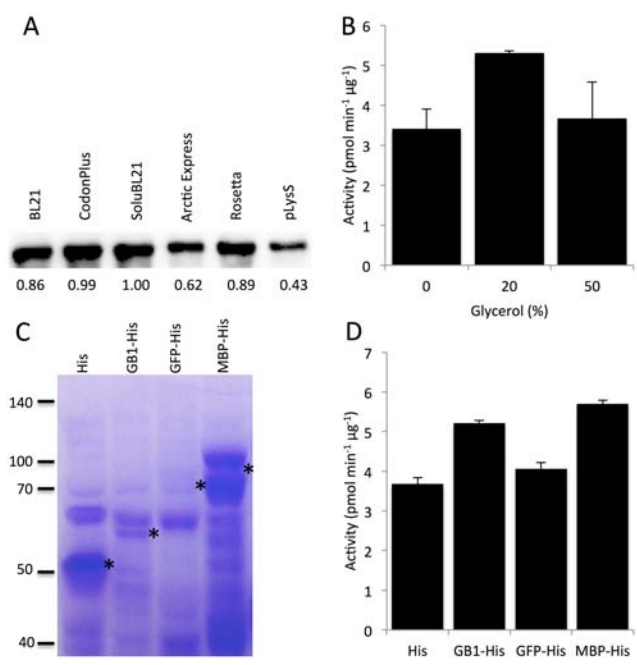

16

17 Supplementary Figure S2. Optimization of expression conditions for XXT2. A. Western  
 18 blot of purified His-GB1-XXT2 expressed in various cell lines. Numbers below the  
 19 bands indicate the relative intensity of the bands as analyzed with ImageJ. B. Effect of  
 20 glycerol on His-GB1-XXT2 activity. All assay reactions contain equal amounts of total  
 21 protein. C. Coomassie stained SDS-PAGE gel of XXT2 expressed with various  
 22 solubility tags. All constructs were expressed in SoluBL21 cells and were purified with  
 23 Ni-NTA columns. Proteins were loaded in equal volumes. XXT2 protein with the  
 24 various tags is shown with asterisks. Expected sizes are His-XXT2: 49.5 kDa; His-GB1-  
 25 XXT2: 56.9 kDa; His-GFP-XXT2: 76.4 kDa; His-MBP-XXT2: 91.2 kDa. D. Enzyme  
 26 activity of purified XXT2 fused with various tags. All reactions contained an equal  
 27 volume of the elution fraction collected from Ni-NTA resin. Products of the enzyme  
 28 assays in B and D were analyzed by HPAEC, quantified by peak integration, and are  
 29 presented as pmol xylose transferred per minute per μg of XXT2. All enzyme assays  
 30 were performed in duplicate.

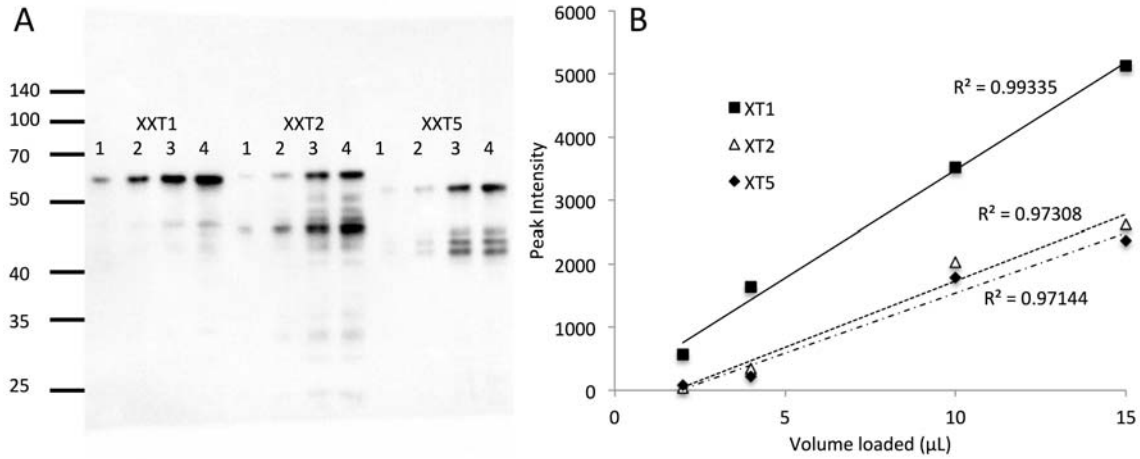

31

32 Supplemental Figure S3. Quantitative western of XXT1, XXT2, and XXT5. A. Western

33 blot of XXT1, XXT2, and XXT5. Concentrated protein was diluted to the appropriate

34 level for detection on western blot, XXT1 was diluted 70-fold, XXT2 was diluted 32-

35 fold, and XXT5 was diluted 20-fold. All diluted protein samples were loaded at four

36 volumes, 2, 4, 10, and 15 μL. B. Band intensity was plotted against volume loaded on

37 the SDS-PAGE gel. Band intensity of full-length proteins was determined using ImageJ.

38 The solid line indicates XXT1 line, the dashed line indicates XXT2 , and the dashed line

39 with large spaces indicates XXT5.

40

41

42

43

44

45

46

47

48

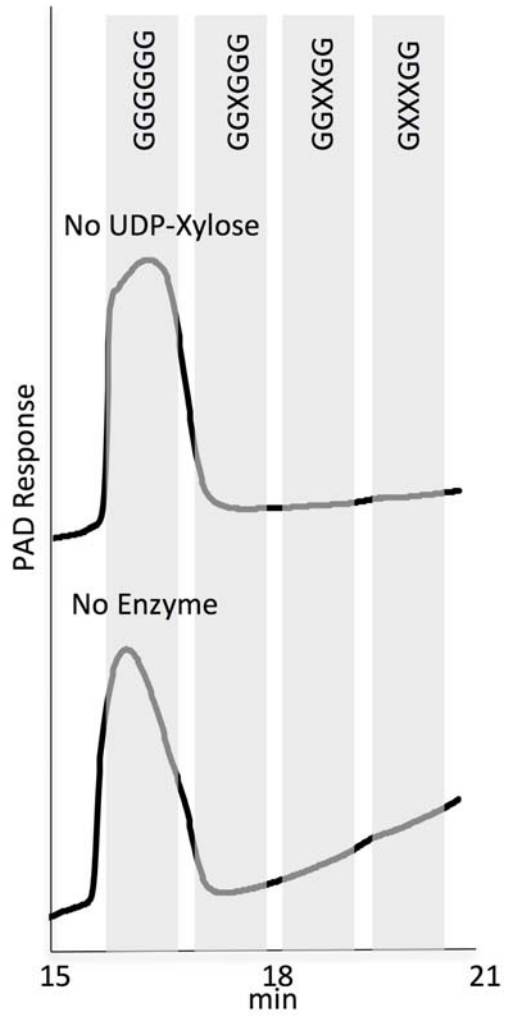

49

50 Supplemental Figure S4. Negative Controls of XXT2 activity assay. Negative control  
 51 reactions were done as described in Material and Methods with either no UDP-xylose or  
 52 no XXT2 in the activity assay mixture.

53

54

55

56

57

58

| Gene             | Direction | Organism  | Sequence                                                                |
|------------------|-----------|-----------|-------------------------------------------------------------------------|
| XXT1             | forward   | Bacterial | ATA GGA TCC GAG AAC CTG TAC TTT CAG GGC ACG CCG GAG AAA GAT ATC         |
| XXT1             | reverse   | Bacterial | ATA GTC GAC TCA CGT CGT CGT CG                                          |
| XXT2             | forward   | Bacterial | ATA GGA TCC GAG AAC CTG TAC TTT CAG GGC AAA TTC GGA ACT CCG GAG         |
| XXT2             | reverse   | Bacterial | GCA CTC GAG TCA AAC TTG ATT GGT                                         |
| XXT5             | forward   | Bacterial | ATA AGA TCT GAG AAC CTG TAC TTT CAG GGC AAC CTA GGA AGC TCA AGC GCC GAT |
| XXT5             | reverse   | Bacterial | ATA CTC GAG CTA GTT CTG TGG TTT GGT                                     |
| XXT5 D228A:D230A | forward   | Bacterial | GATCTGGTGGATGGCTAGTGCTGCTTTGTTCCT                                       |
| XXT5 D228A:D230A | reverse   | Bacterial | AGTGAACAAAGCAGCACTAGCCATCCACCAGATC                                      |
| XXT5             | forward   | Plant     | AATAAGCTTATGGGTCAAGATGGTTC                                              |
| XXT5             | reverse   | Plant     | ACCATATGCTAGTTCTGTGGTTTGGTTCCAC                                         |
| XXT5 D228A:D230A | forward   | Plant     | GTTGATGTTGTCTCATCCAGAAGTTGAGTGGATCTGGTGGATGGCTAGTGCTGCTTTGTTC           |
| XXT5 D228A:D230A | reverse   | Plant     | CCACCAGATCCACTCAACTTCTGGATGAGACAACATCAAC                                |

59

60 Supplemental Table S1. Forward and reverse primers used for the amplification of the  
61 XXTs and the truncations of XXT2. Gene shows the XXT that the primer was used for.  
62 Direction shows the direction the primer will amplify. Organism shows the expression  
63 system.

64
